# Supplementary material
Source: publisher site journal article supplement (https://www.dovepress.com/article/213455)
Supplement: Supplementary file 1 [file get_supplementary_file.php]

**Supporting Information**


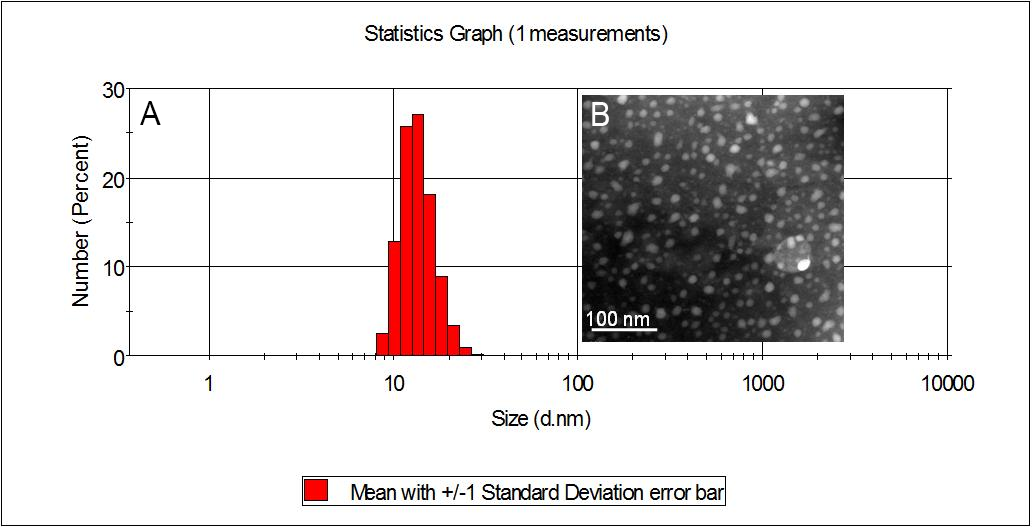


Figure S1. Size distribution (A) and TEM image (B) of IF-7-MNC after size-shrinkage.


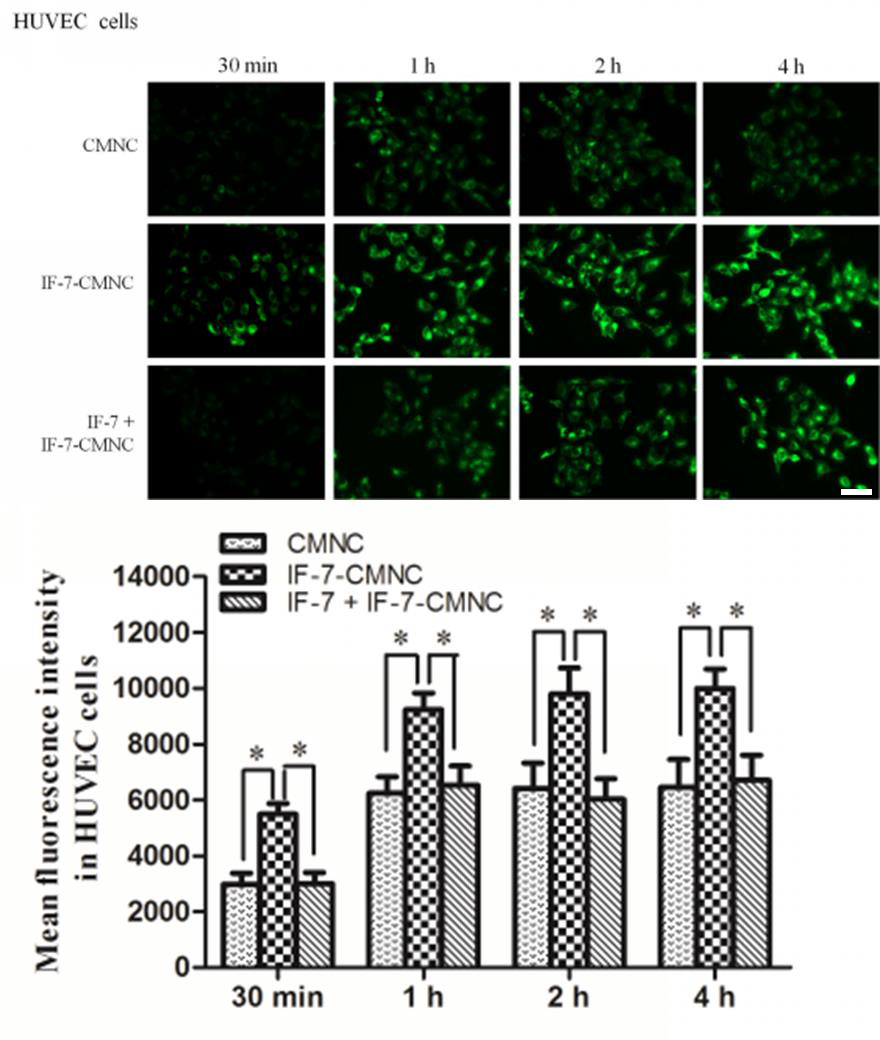


Figure S2. (A) Qualitative and (B) quantitative result of CMNC and IF-7-CMNC taken in by HUVEC cells. The cellular uptake level of IF-7-CMNC by cells pre-incubated with 100 μg IF-7 was served as control. (n = 3) * p < 0.05, ** p < 0.01. Scale bar = 100 μm.

**
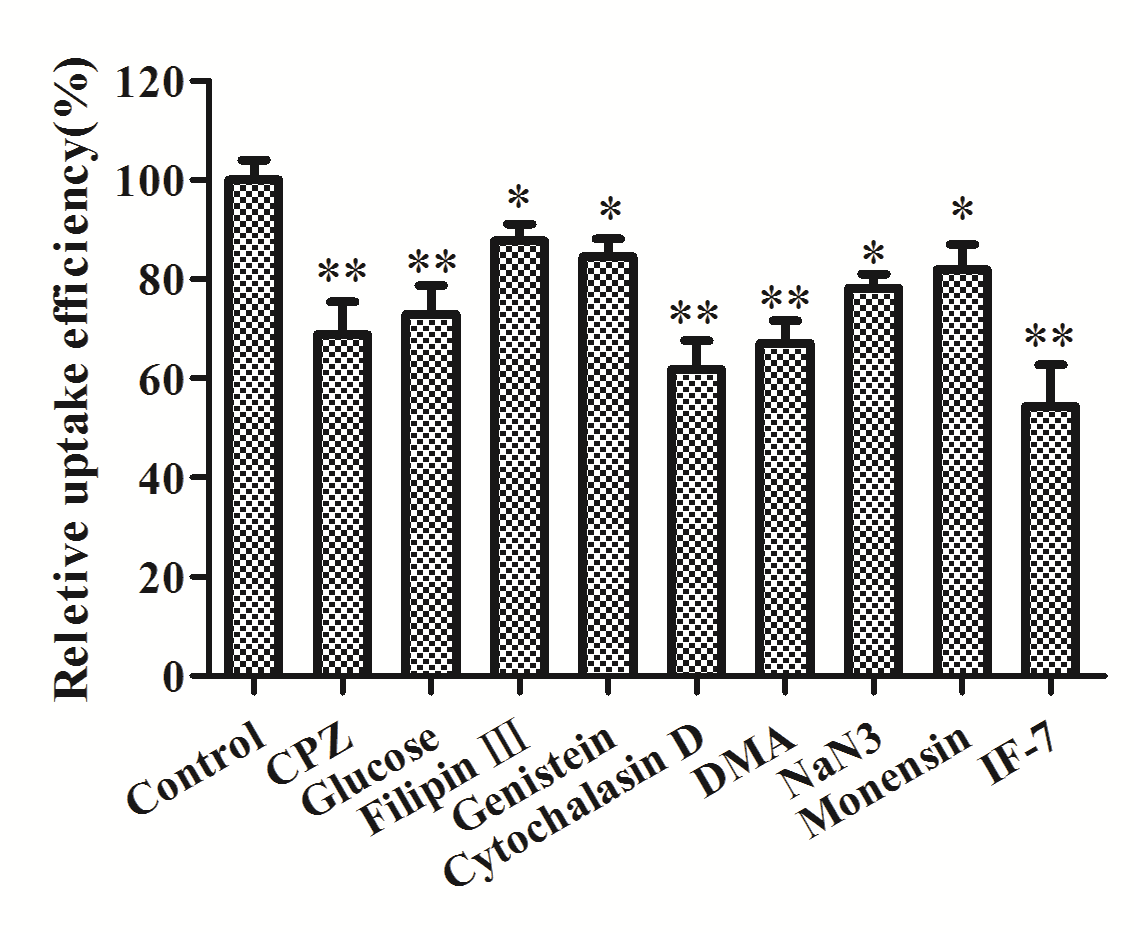
**

Figure S3. Effects of various inhibitors on cellular uptake of IF-7-CMNC in A549 cells. The average fluorescence intensity of IF-7-CMNC in untreated cells served as control (n=3). *p < 0.05, **p < 0.01, significantly different with that of control.
